# Supplementary material for: Biological Role, Mechanism of Action and the Importance of Interleukins in Kidney Diseases
Source: MDPI journal article supplement (doi:10.3390/ijms23020647), 2022-01-07
Supplement: s1 [file s1]

## Supplementary Materials:

**Table S1.** Protein ID and amino acid sequences of interleukins used for bioinformatics analyzes

| Name           | Protein ID | Sequence                                                                                                                                                                                                                                                                                                                                                           |
|----------------|------------|--------------------------------------------------------------------------------------------------------------------------------------------------------------------------------------------------------------------------------------------------------------------------------------------------------------------------------------------------------------------|
| IL-1 $\alpha$  | Q7RU00     | MSFVGENSEGVKMGSEDWEKDEPQCCELDPA GSPLEPGPSLPTMNFVHTSRKVKSLNPKKF<br>SIHDQDQHKVLVLD SGNLIAPVDKNYIRPEIFFALASSLSASA EKGSLILGVS KGEFCL<br>YCDKDKGQSHPSLQLKKEKLMKLA AQKESARRPFIFYRAQVGS RNMLESA AHPGWFICT S<br>CNCNEPVGVTDKFENRKHIEFSFQPVVCKAEMSPSEVSN                                                                                                                    |
| IL-2           | P60568     | MYRMQLLSICIALSLALVTNSAPTSSSTKKTQLQLEHLLDLQMILNGINNYKNPKLTRML<br>TFKFYMPKKATELKHLQCLEEELKPLEEVLNLAQSKNFHLRPDLISNINVIVLELKGE<br>TTFMCEYADETATIVEFLNRWITFCQSIISTLT                                                                                                                                                                                                    |
| IL-3           | P08700     | MSRLPVLLLQLLVRPGLQAPMTQTPLKTSWVNCSNMIDEIITHLKQPPLPLDFNNLN<br>GEDQDILMENNLRPNLEAFNRAVKS LQNASAIESILKNLLPCLPLATAAPTRHPIHIKD<br>GDWNEFRRKLT FYLKTLENAQAQQTTLSLAIF                                                                                                                                                                                                     |
| IL-4           | P05112     | MGLTSQLLPPLFFLLACAGNFVHGHKCDITLQEIIKTLNSLTEQKTLCTELTVTDIFAAS<br>KNTTEKETFCRAATVLRQFYSHHEKDTRCLGATAQQFHRHKQLIRFLKRLDRNLWGLAGL<br>NSCPVKEANQSTLENFLERLKTIMREKYSKCSS                                                                                                                                                                                                  |
| IL-5           | P05113     | MRMLLHLSLLALGAAYVYAIPTEIPTSALVKETLALLSTHRTLLIANETLRIPVPVHKNH<br>QLCTEEIFQGIGTLESQTVQGGTVERLFKNLSLIKKYIDGQKKKCGEERRRVNQFLDY LQ<br>EFLGVMNTEWIIES                                                                                                                                                                                                                    |
| IL-6           | P05231     | MNSFSTSAFGPVAFSLGLLLVLPAAFPAPVPPGEDSKDVAAPHRQPLTSSERIDKQIRYI<br>LDGISALRKETCNKSNMCESSKEALAENNLNLPKMAEKDGCFCQSGFNEETCLVKIITGLL<br>EFEVYLEYLQNRFESEEQARAVQMSTKVLIQFLQKKAKNLDAITTPDPTTNASLLTKLQ<br>AQNQWLQDMTTHLILRSFKEFLQSSLRALRQM                                                                                                                                   |
| IL-7           | P13232     | MFHVSFRYIFGLPPLILVLLPVASSDCDIEGKDGKQYESVLMVSIDQLLDSMKEIGSNCL<br>NNEFNFFKRHICDANKEGMFLFRAARKLRQFLKMNSTGDFDLHLLKVSEGTTILLNCTGQ<br>VKGRKPAALGEAQPTKSLEENKSLKEQKKLNDLCFLKRLQLQEIKTCWNKILMGTKEH                                                                                                                                                                         |
| IL-8           | P10145     | MTSKLAVALLA AFLISAALCEGAVLPRSAKELRCQCIKTYSKPFHPKFIKELRVIESGPH<br>CANTEIIVKLS D GRELCLDPKENWVQRVVEKFLKRAENS                                                                                                                                                                                                                                                         |
| IL-9           | P15248     | MLLAMVLT SALLCSVAGQG CPTLAGILDINFLINKMQEDPASKCHCSANVT SCLCLGIP<br>SDNCTRPCF SERLSQMTNTTMTQTRYPLIFSRVKKSVEVLKNNKCPYFSCEQPCNQTTAGN<br>ALTFLKSLLEIFQKEKMRGMRGKI                                                                                                                                                                                                       |
| IL-10          | P22301     | MHSSALLCCLVLLTGVRASPGQGTQSENSCTHFPGNLPNMLRDLRDAFSRVKTFQMKDQ<br>LDNLLLKESLLEDFKGYLG CQALSEMIQFYLEEVMPPQAENQDPDIKAHVNSLGENLKT LR<br>LRLRRCHRFLPCENKSKAVEQVKNAFNKLQEKGIYKAMSEFDIFINYIEAYMTMKIRN                                                                                                                                                                       |
| IL-11          | P20809     | MNCVCRLVLVLSLWPD TAVAPGPPPGPPRVSPDPRAELDSTVLLTRSLADTRQLAAQL<br>RDKFPADGDHNLDSLPTLAMSAGALGALQLPGLVTRLRADLLSYLRHVQWLR RAGGSSLK<br>TLEPELGT LQARLDRLRLRLQLLMSRLALPQPPDP PAPP LAPPSSAWGGIRAAHAILGG<br>LHLTLDWAVRGLLLKTRL                                                                                                                                               |
| IL-12 $\alpha$ | P29459     | MCPARSLLLVATLVLLDHL SLARNLPVATPDPGMFPC LHHSQNLLRAVSNMLQKARQ TLE<br>FYPCTSEEIDHEDITKDKTSTVEACLPLELTKNESCLNSRETSFITNGSCLASRKTSFMM<br>ALCLSSIYEDLKMYQVEFKTMNAKLLMDPKRQIFLDQNM LAVIDELMQALNFNSETVPQK<br>SSLEEPDFYKTKIKLCILLHA FRIRAVTIDRVMSYLNAS                                                                                                                       |
| IL-12 $\beta$  | P29460     | MCHQQLVISWFSVLVFLASPLVAIWELKKDVYVVELDWYPDAPGEMVVLTC DTPPEEDGITW<br>TLDQSSEVLGSGKTLTIQVKEFGDAGQY TCHKGGEVLSHSLLLLHKKEDGIWSTDILKDQ<br>KEPKNKTFLRCEAKNYSGRFTCW WLT TISTDLTFSVKSSRGSSDPQGVTCGAATLSAERV<br>RGDNKEYEYSVEQEDSACPA AEESLPIEVMVDAVHKLKYENYTSSFFIRDIIKPDPPKN<br>LQLKPLKNSRQVEVSW EYPDTWSTPHSYFSLTFCVQVQGKSKREKKDRVFTDKTSATVIC<br>RKNASISVRAQDRYSSSWSEWASVPCS |
| IL-13          | P35225     | MHPLLNP LLLALGLMALLTTVIALTCLGGFASPGPVPSTALRELIEELVNITQ NQKAP<br>LCNGSMVWSINLTAGMYCAALES LINVSGCSAIEKTQRMLSGFCPHKVSAGQFSSLHVRD<br>TKIEVAQFVKDLLHLK KLFREGRFN                                                                                                                                                                                                        |
| IL-14/TXLNA    | P40222     | MKNQDKKNGAAKQSNPKSSPGQPEAGPEGAQERPSQAAPAVEAEGPGSSQAPRKPEGAQA<br>RTAQSGALRDVSEELSRQLEDILSTYCVDDNNQGGPGEDGAQGEPAEPEDA EKSRTYVARN                                                                                                                                                                                                                                     |

|                |        |                                                                                                                                                                                                                                                                                                                                                                                                                                                                                                                                                                                                                                                                                                                                                                                                                                                                                                                                                                                                                                                                                                                                                                                                                                                                                                                                                                                                                                                                 |
|----------------|--------|-----------------------------------------------------------------------------------------------------------------------------------------------------------------------------------------------------------------------------------------------------------------------------------------------------------------------------------------------------------------------------------------------------------------------------------------------------------------------------------------------------------------------------------------------------------------------------------------------------------------------------------------------------------------------------------------------------------------------------------------------------------------------------------------------------------------------------------------------------------------------------------------------------------------------------------------------------------------------------------------------------------------------------------------------------------------------------------------------------------------------------------------------------------------------------------------------------------------------------------------------------------------------------------------------------------------------------------------------------------------------------------------------------------------------------------------------------------------|
|                |        | GEPEPTPVVNGEKEPSKGDNPNTTEEIRQSDEVGDRDHRRPQEKKKAKGLGKEITLLMQTLN<br>TLSTPEEKLAALCKKYAELLEHRNSQKQMKLLQKKQSQLVQEKDHLRGEHSKAVLARSK<br>LESLCRELQRHNRSLKEEGVQRAREEEEEKRKEVTSHFQVTLNDIQLQMEQHNERNNSKLRQ<br>ENMELAERLKKLIEQYELREEHIDKVFHKHDLQQQLVDAKLQQAQEMLKEAERHQREKD<br>FLLKEAVESQRMCELMKQQETHLKQQLALYTEKFEEFQNTLSKSSEVFTTFKQEMEKMTK<br>KIKKLEKETTMYSRWESSNKALLEMAEEKTVRDKELEGLQVKIQRLEKLCRALQTERND<br>LNKRVQDLSAGGQGS LTDSGPERRPEGPGAQAPSSPRVTEAPCYPGAPSTEASGQTGPQE<br>PTSARA                                                                                                                                                                                                                                                                                                                                                                                                                                                                                                                                                                                                                                                                                                                                                                                                                                                                                                                                                                                        |
| IL-15          | P40933 | MRISKPHLRISISIQCYLCLLLNSHFLTEAGIHVFILGCFSAGLPKTEANWVNVISDLKKI<br>EDLIQSMHIDATLYTESDVHPSCKVTAMKCFLELQVISLES GDASIHDTVENLIILANN<br>SLSSNGNVTESGCKECEELEEKNIKEFLQSFVHIVQMFINTS                                                                                                                                                                                                                                                                                                                                                                                                                                                                                                                                                                                                                                                                                                                                                                                                                                                                                                                                                                                                                                                                                                                                                                                                                                                                                     |
| IL-16          | Q14005 | MESHSRAGKSRSKSAKFRSISRSLMLCNAKTSDDGSSPDEKYPDPFEISLAQGKEGIFHSS<br>VQLADTSEAGPSSVPDLALASEAAQLQAAGNDRGKTCRRIFFMKESSTASSREKPGKLEA<br>QSSNLFPPKACHQRARSNSTSVNPYCTREIDFPMTKKSAAPTDRQPYSLCSNRKLSLQQQL<br>DCPAGKAAGTSRPTSLSTAQLVQPSGGLQASVISNIVLMKGQAKGLGFSIVGGKDSIYG<br>PIGIYVKTIFAGGAAAADGRLQEGDEILELNGESMAGLTHQDALQKFQAKKGLLTLTVR<br>TRLTAPPSLCSHLSPLCRSLSSSTCITKSSSFALESAPISTAKPNYRIMVEVSLQK<br>EAGVGLGIGLCSVPYFQCISGIFVHTLSPGSAHLDGRLRCCGEIVEISDSPVHCLTLNE<br>VYTILSHCDPGVPPIIVSRHPDPQVSEQQKLEAVAQAVENTKFGKERHQWSLEGVKRLES<br>SWHGRPTLEKEREKNSAPPHRRAQKVMIRSSSDSSMSGSPGSGSPGSGSAEKPSSDVIDIS<br>THSPSLPLAREPVVLSIASSRPLQESPPLESRDSHPPLRLKKSFEILVRKPMSSKPKPP<br>PRKYFKSDSDPQKSLEERENSSCSSGHPTTCGQEAARELLPLLLPQEDTAGRSPSASAGC<br>PGPGIGPQTKSSTEGEPGWRRASPVTQTSPIKHPLLKRQARMDDYSFDTTAEDPWVRISDC<br>IKNLFSPIMSENHGHMPLQPNASLNEEEGTQGHDPGTPPKLDTANGTPKVYKSADSSTVK<br>KGPPVAPKPAWFRQSLKGLNRASDPRGLPDPALSTQAPASREHLGSHIRASSSSSIR<br>QRISSFETFGSSQLPDKGAQRLSLQPSGEEAAKPLGKHEEGRFSGLLGRGAAPTLVPQQP<br>EQVLSSGSPAASEARDPGVSESPPPGRQPNQKTLPPGPDPLRLLLSTQAEESQGPVLKMP<br>SQRARSFPLTRSQCETKLLDEKTSKLYSISSQVSSAVMKSLLCLPSSISCAQTPCIPKE<br>GASPTSSNEDSAANGSAETSALDTGFSLNLSELREYTEGLTEAKEDDDGDHSSLQSGQS<br>VISLLSSEELKKLIEEVKVLDEATLKQLDGIHVTLHKEEGAGLGFSLAGGADLENKVIT<br>VHRVFPNGLASQEGTIQKGNEVLSINGKSLKGTTHHDALAILRQAREPRQAVIVTRKLT<br>EAMPDLNSSTDASAASASADVSVESTAEATVCTVTLEKMSAGLGFSLGEGGKSLHGDGP<br>LTINRIFKGAASEQSETVQPGDEILQLGGTAMQGLTRFEAWNIIKALPDGPVTIVIRRS<br>LQSKETTAAGDS |
| IL-17 $\alpha$ | Q16552 | MTPGKTSLSVLLLLSLEAIVKAGITIPRNPGCPNSEDKNFPRTVMVNLNIHNRNTNTNP<br>KRSSDYNNRSTSPWNLHRNEDPERYPVSIWEAKCRHLGCINADGNVDYHMNSVPIQQEIL<br>VLRREPPHCPNSFRLEKILVSVGCTCVTPIVHHVA                                                                                                                                                                                                                                                                                                                                                                                                                                                                                                                                                                                                                                                                                                                                                                                                                                                                                                                                                                                                                                                                                                                                                                                                                                                                                              |
| IL-18          | Q14116 | MAAEPVEDNCINFVAMKFIDNTLYFIAEDDENLESDFGKLESKLSVIRNLNDQVLFIDQ<br>GNRPLFEDMTDSDCRDNAPRTIFIISMYKDSQPRGMAVTISVKCEKISTLSCENKIISFK<br>EMNPPDNIKDTKSDIIFQRSVPGHDNKMQFESSYEGYFLACEKERDLFKLILKKEDDEL<br>GDRSIMFTVQNEDE                                                                                                                                                                                                                                                                                                                                                                                                                                                                                                                                                                                                                                                                                                                                                                                                                                                                                                                                                                                                                                                                                                                                                                                                                                                    |
| IL-19          | Q9UHD0 | MKLQCVSLWLLGTILILCSVDNHGLRRCLISTDMHHIEESFQEIKRAIQAKDTFPNVTL<br>STLETQIIKPLDVCCVTKNLLAFYVDRVFKDHQEPNPKILRKISSIANSFLYMQKTLRQ<br>CQEQRQCHCRQEATNATRVIHNDYDQLEVHAAAIKSLGELDVFLAWINKNHEVMFSA                                                                                                                                                                                                                                                                                                                                                                                                                                                                                                                                                                                                                                                                                                                                                                                                                                                                                                                                                                                                                                                                                                                                                                                                                                                                         |
| IL-20          | Q9NYY1 | MKASSLAFSLLSAAFYLLWTPSTGLKTLNLGSCVIATNLQEIRNGFSEIRGSVQAKDGN<br>DIRILRRTESLQDTKPANRCCLLRHLLRLYLDRVFKNYQTPDHYTLRKISSLANSFLTIK<br>KDLRLCHAHMTCHCGEEAMKKYSQILSHFEKLEPQAAVVKALGELDILLQWMEETE                                                                                                                                                                                                                                                                                                                                                                                                                                                                                                                                                                                                                                                                                                                                                                                                                                                                                                                                                                                                                                                                                                                                                                                                                                                                         |
| IL-21          | Q9HBE4 | MRSSPGNMERIVICLMVIFLGTLVHKSSSQQDRHMIRMRLIDIVDQLKNYVNDLVPEF<br>LPAPEDVETNCEWSAFSCFQKAQLKSANTGNNERIINVSIIKKLRKPPSTNAGRRQKHRL<br>TCPSCDSYEKKPPKEFLERFKSLQKMIHQHLSRTHGSEDS                                                                                                                                                                                                                                                                                                                                                                                                                                                                                                                                                                                                                                                                                                                                                                                                                                                                                                                                                                                                                                                                                                                                                                                                                                                                                          |
| IL-22          | Q9GZX6 | MAALQKSVSSFLMGTLATSCLLLLALLVQGGAAPISSHCRDLKSNFQQPYITNRTFMLA<br>KEASLADNNTDVRILIGEKLFGHGVSMERCYLMKQVLNFTLEEVLFPQSDRFQPYMQEVVP<br>FLARLSNRLSTCHIEGDDLHIQRNVQKLKDTVKKLGESGEIKAIGELDLLFMSLRNACI                                                                                                                                                                                                                                                                                                                                                                                                                                                                                                                                                                                                                                                                                                                                                                                                                                                                                                                                                                                                                                                                                                                                                                                                                                                                     |
| IL-23 $\alpha$ | Q9NPF7 | MLGSRAVMLLLLLPWTAQGRAVPGGSPAWTQCQQLSQKLCTLAWSAHLPLVGHMDLREEG<br>DEETTNDVPHIQCGDGDGPQGLRDNSQFCLQRIHQGLIFYEKLIGSDIFTGEPSSLPDSP<br>VGQLHASLLGLSLLQPEGHHWETQQIPSLSPSQPWQRLLLRFKILRSLQAFVAVAAARVF<br>AHGAATLSP                                                                                                                                                                                                                                                                                                                                                                                                                                                                                                                                                                                                                                                                                                                                                                                                                                                                                                                                                                                                                                                                                                                                                                                                                                                       |

|                |        |                                                                                                                                                                                                                                                                                                                                                                                                                                                                                                                                                                           |
|----------------|--------|---------------------------------------------------------------------------------------------------------------------------------------------------------------------------------------------------------------------------------------------------------------------------------------------------------------------------------------------------------------------------------------------------------------------------------------------------------------------------------------------------------------------------------------------------------------------------|
| IL-24          | Q13007 | MNFQQRLQSLWTLARPCPPLLATASQMQMVVLPCLGFTLLLWSQVSGAQGQEFHFGPCQ<br>VKGVPVQKLWEAFWAVKDTMQAQDNITSARLLQQEVLQNVSDAESCYLVHTLLEFYLKTV<br>FKNYHNRTVEVRTLKSFSTLANNFVLIVSQLQPSQENEMFSIRDSAHRRFLLFRRAFKQL<br>DVEAALTKALGEVDILLTWMQKFYKL                                                                                                                                                                                                                                                                                                                                                 |
| IL-25          | Q9H293 | MRERPRLGEDSSLISLFLQVVAFLAMVMGTHTYSHWPSCCPSKQDQTSEELLRWSTVPVP<br>PLEPARPNRHPESCRASEDGPLNSRAISPWRYELDRDLNRLPDLYHARCLCPHCVSLOT<br>GSHMDPRGNSELLYHNQTVFYRRPCHGEKGTHKGCYCLERRLYRVSLACVCVRPRVMG                                                                                                                                                                                                                                                                                                                                                                                 |
| IL-26          | Q9NHP9 | MLVNFILRCGLLLVTLSLAIAKHKQSSFTKSCYPRGTLQAQVDALYKAAWLKATIPEDR<br>IKNIRLLKKKTKKQFMKNCQFQEQLLSFFMEDVFGQLQLQGCKKIRFVEDFHSLRQKLSH<br>CISCASSAREMKISITRMKRIFYRIGNKGIYKAISELDILLSWIKKLESSQ                                                                                                                                                                                                                                                                                                                                                                                        |
| IL-27 $\alpha$ | Q8NEV9 | MGQTAGDLGWRLSLLLLPLLLVQAGVWGFP RPGRPQLSLQELRREFTVSLHLARKLLSE<br>VRGQAHRAESHLPVGNLYLLPLGEQLPDVSLTFQAWRRLSDPERLCFISTTLQPFHALL<br>GGLGTQGRWTNMERMQWAMRLDLRDLQRHLRFQVLAAGFNLPEEEEEEEEEEEEEERKGL<br>LPGALGSALQGPAQVSWPQLLSTYRLLHSELVLSRAVRELLLLSKAGHSVWPLGFPTLS<br>PQP                                                                                                                                                                                                                                                                                                         |
| IL-27 $\beta$  | Q14213 | MTPQLLLALVLWASCPPCSGRKGPPAALTLPVQCRASRYPIAVDCSWTLPPAPNSTSPV<br>SFIATYRLGMAARGHSWPCLQQTPTSTCTITDVQLFSMAPYVLNVTAVHPWGSSSSFPV<br>FITEHIKPDPPPEGVRLSPLAERQLQVQWEPGSGWPFPEIFSLKYWIRYKRQGAARFHRV<br>GPIEATSFILRAVRPRARYYVQVAAQDLTDYGELSDWSLPATATMSLGK                                                                                                                                                                                                                                                                                                                           |
| IL-28          | Q8IU57 | MAGPERWGPLLLCLLQAAPGRPRLAPPQNVTLTLLSQNFVSVLTWLPGLGNPQDVITYFVAYQ<br>SSPTRRRRWREVEECAGTKELLCMMCLKKQDLYNKFKGRVRTVSPSSKSPWVESEYLDYL<br>FEVEPAPPVLVLTQTEEILSANATYQLPPCMPPLDLKYEVAFWKEGAGNKTLFPVTPHGG<br>PVQITLQPAASEHHCLSAITYTFSVPKYSKFSKPTCFLLEVPEANWAFVLVPSLLILL<br>VIAAGGVIWKTLMGNPWFWQRAKMPRALDFSGHTHPVATFQPSRPESVNDLFLCPQKELTR<br>GVRPTPRVRAPATQQTRWKKDLAEDDEEEDEEDTEDGVSFQPYIEPPSFLGQEHQAPGHS<br>EAGGVDSGRPRAPLVPSEGSSAWDSSDRSWASTVDSSWDRAGSSGYLAEKGPQGPGGDG<br>HQESLPPPEFSKDSGFLEELPEDNLSSWATWGTLPPPEPNLVPGGPPVSLQTLTFCWESSP<br>EEEEARESEIEDSDAGSWGAESTQRTEDRGRTLGHYMAR |
| IL-29/IFNL1    | Q8IU54 | MAAAWTVVLVTLVLGLAVAGVPVPTSPTTTGKGCHIGRFKSLSPQELASFKKARDALEES<br>LKLKNWSCSSPVFPGNWDRLQLQVRERPVAAELALTLKVLEAAAGPALEDVLDQPLHT<br>LHHILSQLQACIQPQPTAGPRPRGRLLHHWLHRLQEAPKKEAGCLEASVTFNLFRLTRD<br>LKYVADGNLCLRTSTHPEST                                                                                                                                                                                                                                                                                                                                                         |
| IL-30          | Q8NEV9 | MGQTAGDLGWRLSLLLLPLLLVQAGVWGFP RPGRPQLSLQELRREFTVSLHLARKLLSE<br>VRGQAHRAESHLPVGNLYLLPLGEQLPDVSLTFQAWRRLSDPERLCFISTTLQPFHALL<br>GGLGTQGRWTNMERMQWAMRLDLRDLQRHLRFQVLAAGFNLPEEEEEEEEEEEEEERKGL<br>LPGALGSALQGPAQVSWPQLLSTYRLLHSELVLSRAVRELLLLSKAGHSVWPLGFPTLS<br>PQP                                                                                                                                                                                                                                                                                                         |
| IL-31          | Q6EBC2 | MASHSGPSTSVLFLFCCLGWLASHTLPVRLLRPSDDVQKIVEELQSLSKMLLKDVVEEK<br>GVLVSQNYTLPCLSQPAQPPNNIHSPAIRAYLKTIRQLDNKSVIDEIIEHLDKLIFQDAP<br>ETNISVPTDTHECKRFILISQQFSECMDLALKSLTSGAQQATT                                                                                                                                                                                                                                                                                                                                                                                                |
| IL-32          | P24001 | MCFPKVLSDDMKKLKARMVMLLPTSAQQLGAWVSACDTEDTVGHGLGPWRDKDPALWCQLC<br>LSSQHQAIERFYDKMQNAESGRGQVMSSLAEELEDDFKEGYLETVAAYYEEQHPELTPLLE<br>KERDGLRCRGNRSPVPDVEDPATEEPGESFCDKVMRWFOAMLQRLQTWWHGVLAHVKEKV<br>VALVHAVQALWKQFQSFCCSLSELFMSFSQSYGAPRGDKEELTPQKCSEPPSSK                                                                                                                                                                                                                                                                                                                  |
| IL-33          | O95760 | MKPKMKYSTNKISTAKWKNTASKALCFKLGSQQKAKEVCPMYFMKLRSGLMIKKEACYF<br>RRETTKRPSLKTGRKHKRHLVLAACQQQSTVECFAGISGVQKYTRALHDSSITGISPIT<br>EYLASLSTYNDQSITFALEDESYEIVEDLKKDEKKDKVLLSYYESQHPSNESGDGVDGK<br>MLMVTLSPTKDFWLHANNKEHSVELHKCEKLPDQAFFVLHNMHSNCVSFECKTDPGVFI<br>GVKDNHLALIKVDSSSENLCATENILFKLSET                                                                                                                                                                                                                                                                              |
| IL-36 $\alpha$ | Q9UHA7 | MPRGFTWLRYLGLFGLVALGNEPLEMWPLTQNEECTVTGFLRDKLQYRSRLQYMKHYFPI<br>NYKISVPYEGVFRIANVTRLQRAQVSERELRYLVVLVLSATESVQDVLLLEGHPSWKYLQ<br>EVETLLLNQVQGLTDVEVSPKVESVLSLLNAPGPNLKLVRPKALLDNCFRVMELLYCSCC<br>KQSSVLNWQDCEVPSPQSCSPEPSLQYAATQLYPPPPWSPSSPHSTGSRPVRAQGEGL<br>LP                                                                                                                                                                                                                                                                                                          |
| IL-36 $\beta$  | Q9NZH7 | MNPQREAAPKSYAIRDSRQMVWVLSGNSLIAAPLSRSIKPVTLHLIACRDTEFSDKEKGN<br>MVYLGIGKGDLCFCAEIQ GKPTLQLKLQGSQDNIGKDTCKWLVGIHTCINLDVRESCFM<br>GTLDQWGIGVGRKKWKSSFQHHHLRKKDKDFSSMRTNIGMPGRM                                                                                                                                                                                                                                                                                                                                                                                              |

|                |        |                                                                                                                                                                                                                                                                                        |
|----------------|--------|----------------------------------------------------------------------------------------------------------------------------------------------------------------------------------------------------------------------------------------------------------------------------------------|
| IL-36 $\gamma$ | Q9NZH8 | MRGTPGDADGGGRAVYQSMCKPITGTINDLNQQVWTLQGQNLVAVPRSDSVTPVTVAVIT<br>CKYPEALEQGRGDPYILGIQNPEMCLYCEKVGEQPTLQLKEQKIMDLYGQPEPVKPFIFY<br>RAKTGRSTLESVAFPDWFIASSKRDQPIILTSELGKSYNTAFELNIND                                                                                                       |
| IL-37          | Q9NZH6 | MSFVGENSGVKMGSEDWEKDEPQCCELPAGSPLEPGPSLPTMNFVHTSPKVKNLNPKKF<br>SIHDQDHKVLVLDSGNLIAVPDKNYIRPEIFFALASSLSSASAEKGSPIILGVSKGEFCL<br>YCDKDKGQSHPSLQLKKEKLMKLAAQKESARRPFIFYRAQVGSWNMLESAHPGWFICT<br>CNCNEPVGVTDKFENRKHIEFSFQPVCKAEMSPSEVSD                                                    |
| IL-38          | Q8WWZ1 | MCSLPMARYYIIKYADQKALYTRDGQLLVGDPVADNCCAEEKICILPNRGLARTKVPIFLG<br>IQGGSRLACVETEEGPSLQLEDVNIEELYKGGEEATRFTFFQSSSGSAFRLEAAAWPGW<br>FLCGPAEPQQPVQLTKESEPSARTKFYFEQSW                                                                                                                       |
| IL-40          | Q6UX52 | MGLPGLFCLAVLAASSFSKAREEEITPVVSIAYKVLEVFPKGRWVLITCCAPQPPPPITY<br>SLCGTKNIKVAKKVVKTHEPASFNLNVTLKSSPDLLTYFCWASSTSGAHVDSARLQMHWE<br>LWSKPVSELNANFTLQDRGAGPRVEMICQASSGSPITNSLIGKDGQVHLQQRPCHRQPA<br>NFSFLPSQTSDFWCQAANNANVQHSALTVPVPGGDQKMEDWQGPLESPIALPLYRSTR<br>RLSEEEFGGFRIGNGEVRGRKAAAM |
